# Supplementary material for: Spinal Neuropeptide Y1 Receptor-Expressing Neurons Form an Essential Excitatory Pathway for Mechanical Itch
Source: PubMed Central journal article supplement — Cell Rep. Author manuscript; Available in PMC 2019 Aug 26. (PMC6709688; doi:10.1016/j.celrep.2019.06.033), 2019-07-16
Supplement: NIHMS1534955-supplement-1.pdf [file NIHMS1534955-supplement-1.pdf]

**Cell Reports, Volume 28**

**Supplemental Information**

**Spinal Neuropeptide Y1 Receptor-Expressing  
Neurons Form an Essential Excitatory  
Pathway for Mechanical Itch**

**David Acton, Xiangyu Ren, Stefania Di Costanzo, Antoine Dalet, Steeve Bourane, Ilaria Bertocchi, Carola Eva, and Martyn Goulding**

## **Supplemental Information**

### **Spinal NPY1R+ Neurons form an Essential Excitatory Pathway for Mechanical Itch**

**David Acton, Xiangyu Ren, Stefania Di Costanzo, Antoine Dalet, Steeve Bourane, Illarai Bertocchi, Carola Eva, and Martyn Goulding**

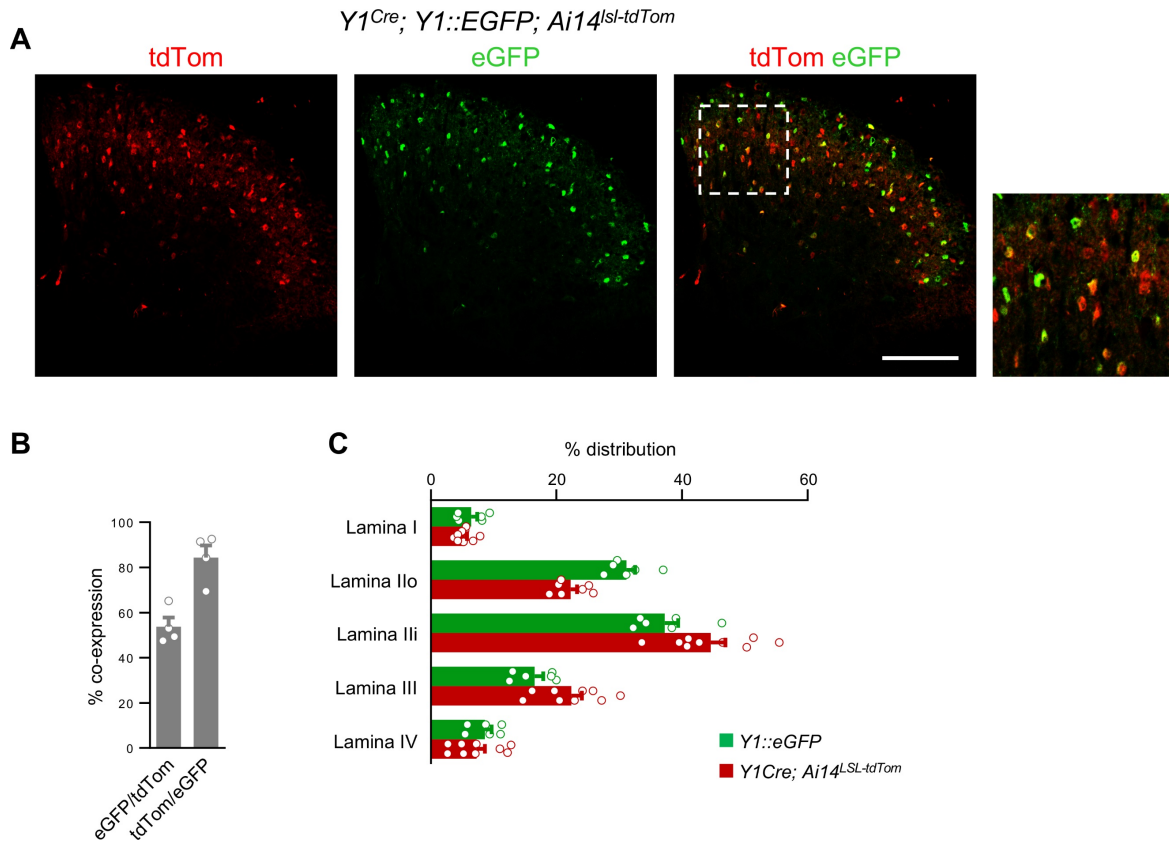

**Figure S1 related to Figure 1. Characterization of *Y1::EGFP* expression.**

(A) Sections from the lumbar spinal cord of a P42 *Y1<sup>Cre</sup>; Y1::EGFP; Ai14<sup>LSL-tdTom</sup>* mouse showing overlapping expression of tdTomato and eGFP. Scale bar: 100  $\mu$ m. (B) Summary of tdTomato and eGFP co-expression ( $n = 4$  mice). (C) Comparison of Y1-tdTomato and Y1-eGFP expression by lamina ( $n = 6-9$  mice). Data: mean  $\pm$  SEM.

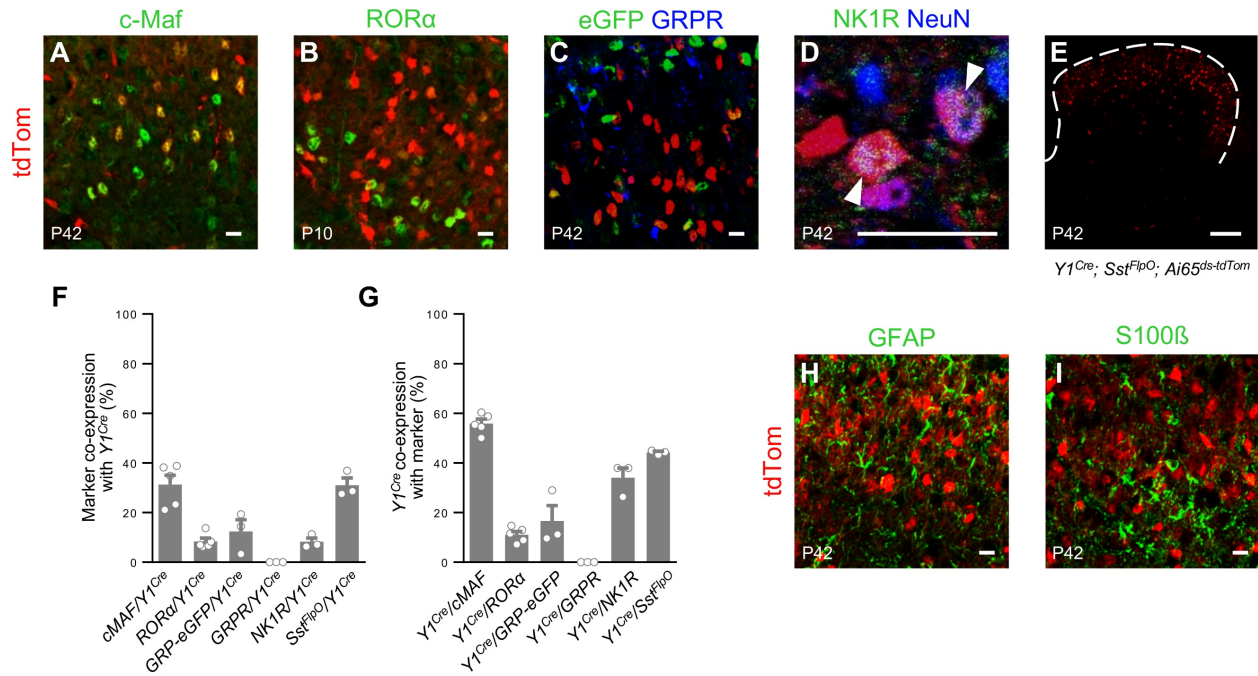

**Figure S2 related to Figure 1. Co-expression of markers of dorsal horn cell populations with  $Y1^{Cre}$ .**

(A-D) Sections of lumbar spinal cords showing co-expression of  $Y1^{Cre}$  with markers of dorsal horn excitatory neurons: cMaf co-expression was assessed by antibody staining in lumbar spinal cord sections from P42  $Y1^{Cre}; Ai14^{sl-tsTomato}$  mice (A). RAR-related orphan receptor alpha ( $ROR\alpha$ ) expression was assessed by antibody labelling in P10  $Y1^{Cre}; Ai14^{sl-tsTomato}$  mice (B). Co-expression of  $Y1^{Cre}$  with gastrin releasing peptide (GRP) and antibody-labeled gastrin-releasing peptide receptor (GRPR) was assessed in P42  $Y1^{Cre}; Ai14^{sl-tsTomato}; GRP::eGFP$  mice (C). Neurokinin-1 receptor (NK1R) co-expression was assessed by antibody staining in lumbar spinal cord sections from P42  $Y1^{Cre}; Ai14^{sl-tsTomato}$  mice; an antibody against the pan-neuronal marker NeuN was employed to facilitate identification of  $Y1^{-}/tdTomato^{-}/NK1R^{+}$  neurons (D). (E) Somatostatin (Sst) co-expression was assessed by comparing  $Y1^{+}/Sst^{+}$  neurons in P42  $Y1^{Cre}; Sst^{FlpO}; Ai65^{ds-tsTomato}$  mice. (F and G) Quantification of the data exemplified in panels A-E: the proportions of  $Y1^{Cre}$  neurons co-expressing markers of other neuronal populations (F) and of those other populations co-expressing tdTomato (G). (H and I) tdTomato did not colocalize with antibody-labeled GFAP (H) or S100 $\beta$  (I), markers of glia.  $n = 3-5$  mice for each condition. Scale bars: 100  $\mu$ m. Data: mean  $\pm$  SEM.

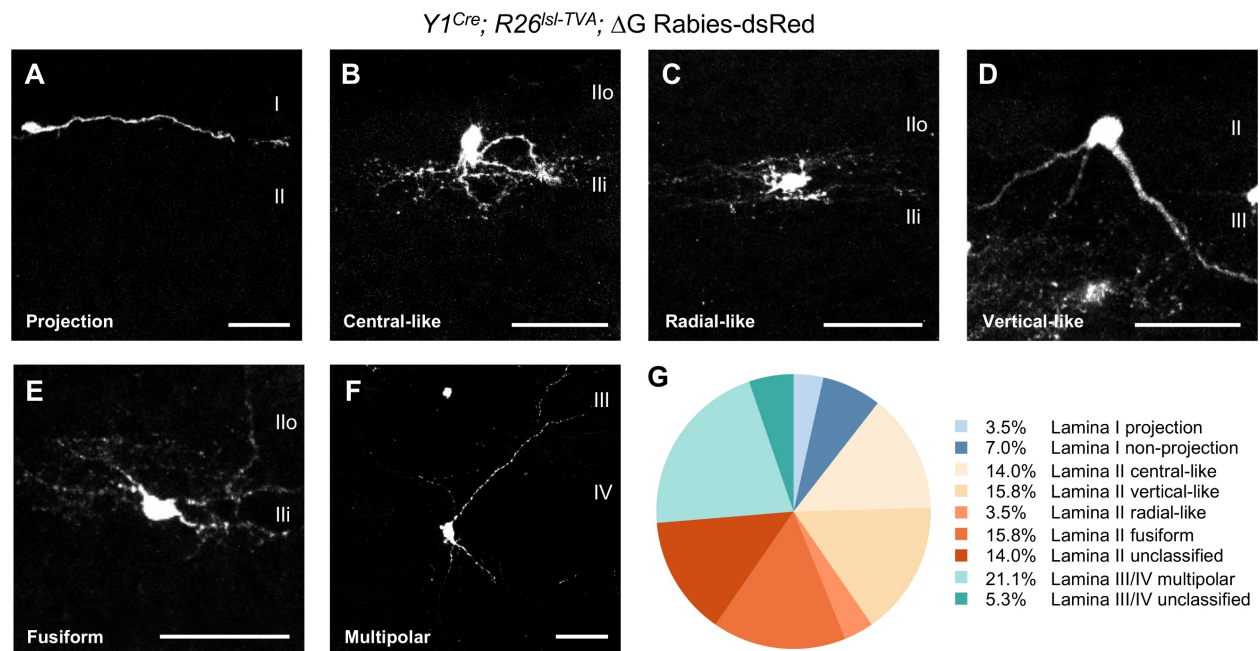

**Figure S3 related to Figure 1. Morphological analysis of *Y1<sup>Cre</sup>* neurons.**

(A-F) Examples of laminae I-IV *Y1<sup>Cre</sup>* neuron morphologies (red) in sagittal sections from the lumbar spinal cord of P15 *Y1<sup>Cre</sup>; R26<sup>Isl-TVA</sup>* mice injected with EnvA ΔG dsRed-rabies virus at P10. (G) Quantification of *Y1<sup>Cre</sup>* neuronal morphologies in laminae I-IV.  $n = 53$  cells from 5 mice. Scale Bars: 50  $\mu\text{m}$ .

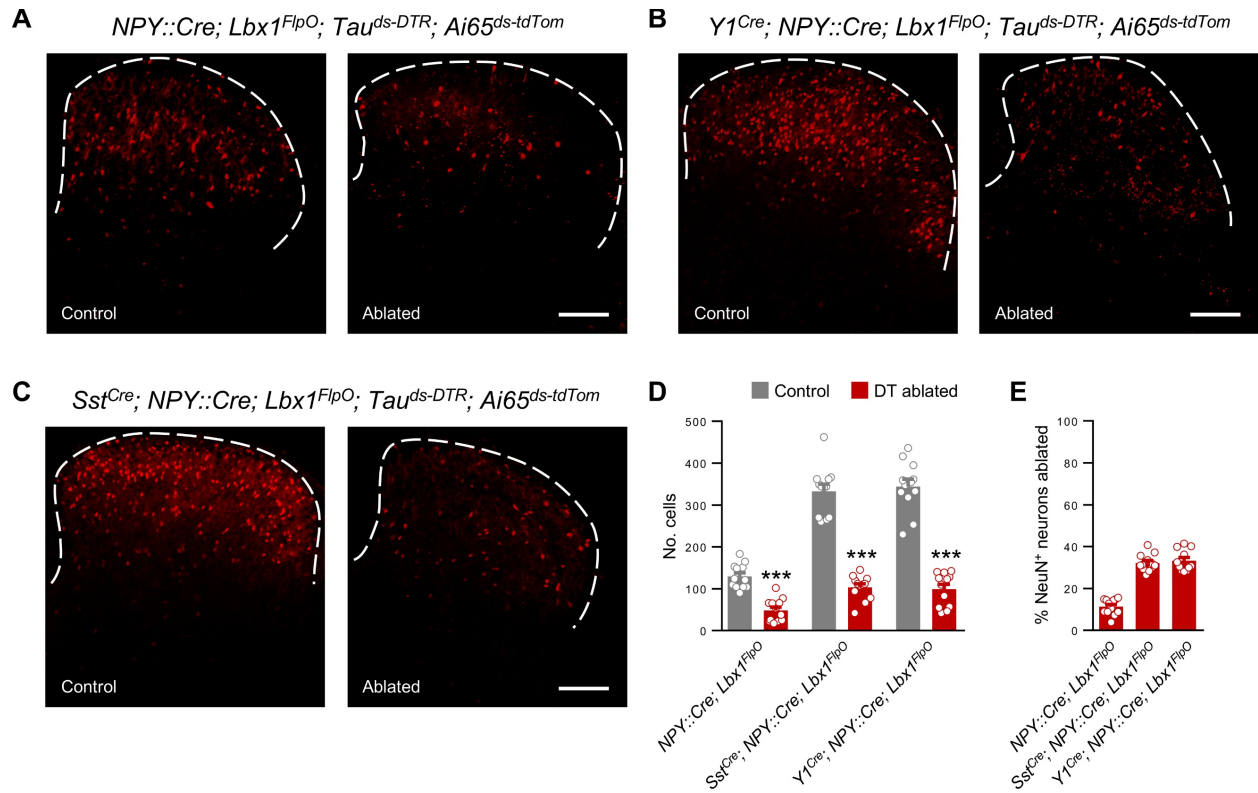

**Figure S4 related to Figure 3. Ablation efficiency in NPY::Cre IN phenotype-recovery experiment.**

(A-C) Transverse sections through the lumbar spinal cords of P49 mice treated with saline (control, left) or DT (ablated, right): *NPY::Cre; Lbx1<sup>FlpO</sup>; Tau<sup>ds-DTR</sup>; Ai65<sup>ds-tdTom</sup>* (A), *Y1<sup>Cre</sup>; NPY::Cre; Lbx1<sup>FlpO</sup>; Tau<sup>ds-DTR</sup>; Ai65<sup>ds-tdTom</sup>* (B), *Sst<sup>Cre</sup>; NPY::Cre; Lbx1<sup>FlpO</sup>; Tau<sup>ds-DTR</sup>; Ai65<sup>ds-tdTom</sup>* (C). (D) Summary of cell numbers for each condition. The ablation efficiency, assessed as percentage reduction in cell number, did not differ between genotypes (one-way ANOVA,  $p > 0.5$ ). (E) Percentage reduction of NeuN<sup>+</sup> neurons in laminae I-IV for each DT-treated phenotype.  $n = 3$  sections from 4 mice per condition. Scale bars: 100  $\mu\text{m}$ . \*\*\* $p < 0.001$ . Data: mean  $\pm$  SEM.

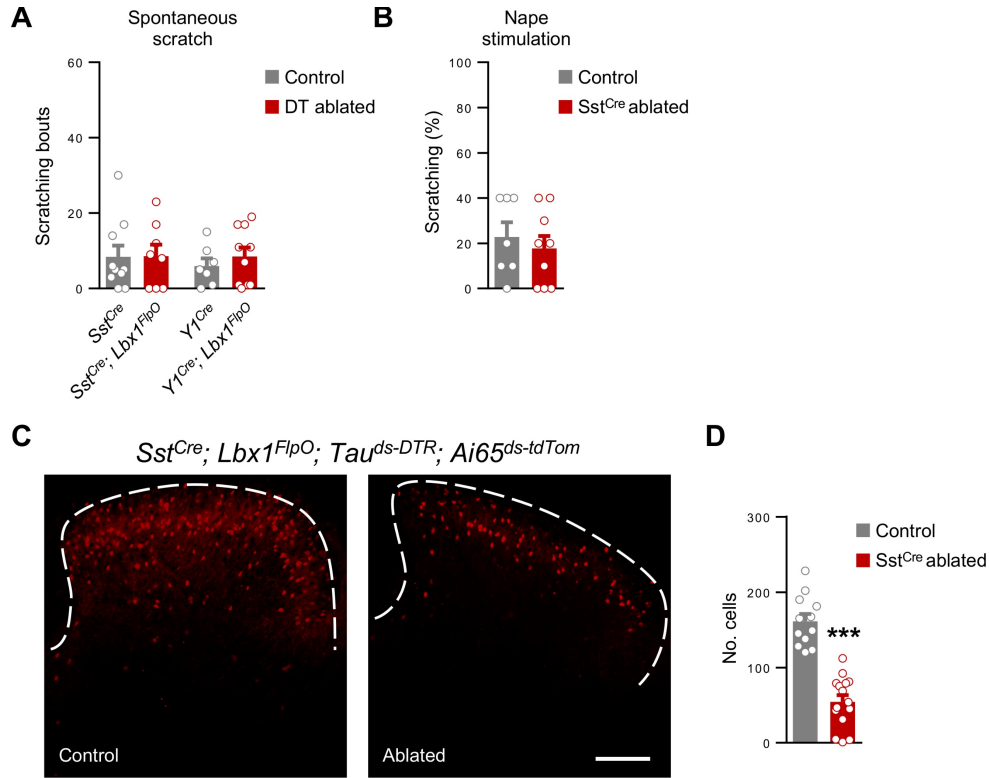

**Figure S5 related to Figure 3. *Sst<sup>Cre</sup>* neurons do not determine sensitivity to mechanical itch.**

(A) Spontaneous scratching is unchanged in mice 1 week after ablation of dorsal horn *Sst<sup>Cre</sup>* (*Sst<sup>Cre</sup>; Lbx1<sup>FlpO</sup>; Tau<sup>ds-DTR</sup>; Ai65<sup>ds-tdTom</sup>*,  $n = 8$ ) or *Y1<sup>Cre</sup>* neurons (*Y1<sup>Cre</sup>; Lbx1<sup>FlpO</sup>; Tau<sup>ds-DTR</sup>; Ai65<sup>ds-tdTom</sup>*,  $n = 10$ ) compared with DT-treated controls lacking FlpO-dependent DT-receptor expression (*Sst<sup>Cre</sup>; Tau<sup>ds-DTR</sup>; Ai65<sup>ds-tdTom</sup>*,  $n = 10$ ; *Y1<sup>Cre</sup>; Tau<sup>ds-DTR</sup>; Ai65<sup>ds-tdTom</sup>*,  $n = 7$ ). (B) Scratching responses to stimulation of the nape by a 0.16 g von Frey hair are unchanged when *Sst<sup>+</sup>* neurons are ablated in *Sst<sup>Cre</sup>; Lbx1<sup>FlpO</sup>; Tau<sup>ds-DTR</sup>; Ai65<sup>ds-tdTom</sup>* mice treated with DT ( $n = 9$ ) compared with saline-treated controls ( $n = 7$ ). (C) Sections of lumbar spinal cords from P49 *Sst<sup>Cre</sup>; Lbx1<sup>FlpO</sup>; Tau<sup>ds-DTR</sup>; Ai65<sup>ds-tdTom</sup>* mice treated with saline (control) or DT (ablated). (D) Summary of ablation efficiency (control,  $n = 4$  mice; ablated,  $n = 5$ ; 3 sections per cord). Scale bars: 100  $\mu\text{m}$ . \*\*\* $p < 0.001$ . Data: mean  $\pm$  SEM.

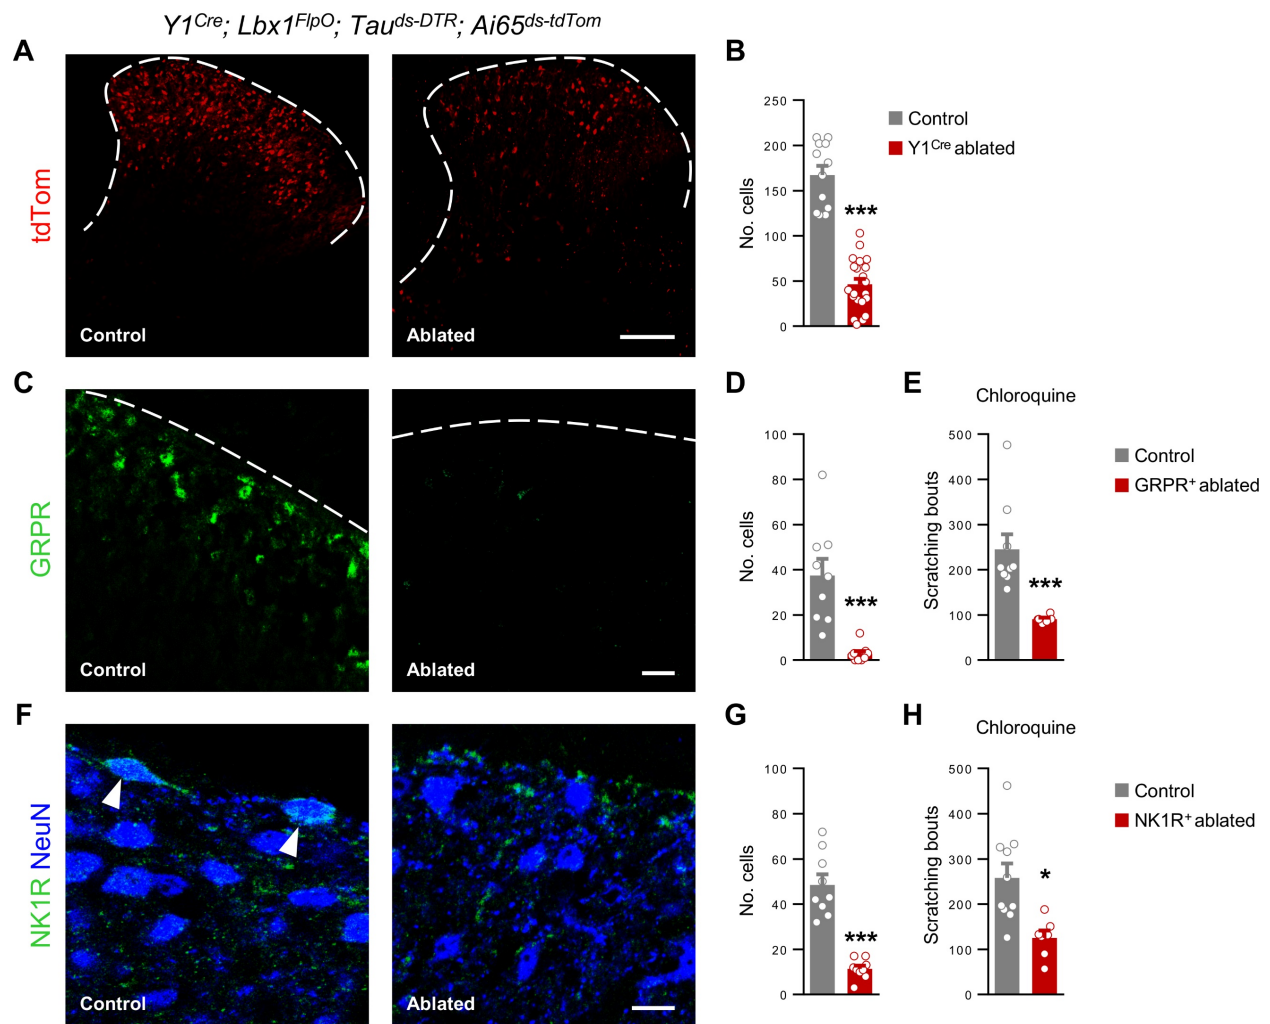

**Figure S6 related to Figure 3. Efficiency of cell ablation.**

(A) Sections of lumbar spinal cords from P49 *Y1<sup>Cre</sup>; Lbx1<sup>FlpO</sup>; Tau<sup>ds-DTR</sup>; Ai65<sup>ds-tdTom</sup>* mice treated with saline (control; left) or DT (ablated; right). Scale bar: 100  $\mu$ m. (B) Summary of *Y1<sup>Cre</sup>* neuron ablation efficiency (control, 6 cords; ablated, 7 cords; 3 sections per cord). (C) Sections from P42 wild type mice showing loss of *GRPR* immunoreactivity in the superficial dorsal horn at the cervical level 2 weeks after treatment with control SAP (left panel) or BOM-SAP (right panel) to ablate *GRPR<sup>+</sup>* neurons. Scale bar: 20  $\mu$ m. (D) Summary of *GRPR<sup>+</sup>* neuron ablation efficiency (control,  $n = 3$  mice; ablated,  $n = 3$ ; 3 sections per cord). (E) Chloroquine-induced scratching is reduced in wild type mice 2 weeks following treatment with BOM-SAP ( $n = 6$ ; controls,  $n = 8$ ). (F) Sections from P42 wild type mice showing loss of *NK1R* immunoreactivity in the superficial dorsal horn at the cervical level 2



weeks after treatment with control SAP (left panel) or with SSP-SAP (right panel) to ablate NK1R<sup>+</sup> neurons. Scale bar: 10  $\mu$ m. **(G)** Summary of NK1R<sup>+</sup> neuron ablation efficiency (control,  $n = 3$  mice; ablated,  $n = 3$ ; 3 sections per cord). **(H)** Chloroquine-induced scratching is reduced in wild type mice 2 weeks following treatment with SSP-SAP ( $n = 7$ ; controls,  $n = 10$ ). \* $p < 0.05$ , \*\*\* $p < 0.001$ . Data: mean  $\pm$  SEM.

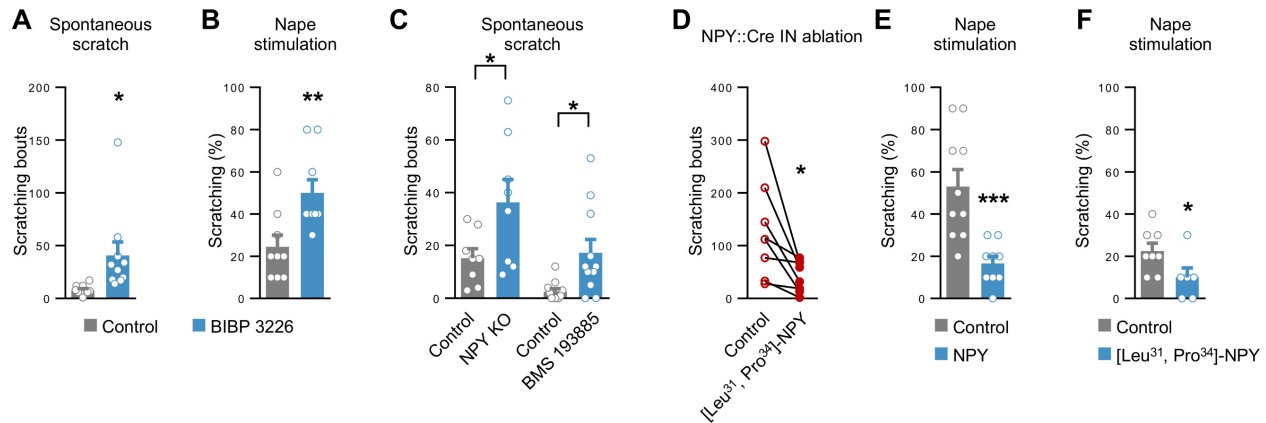

**Figure S7 related to Figures 6 and 7. Y1 receptors modulate mechanical itch.**

**(A and B)** I.t. injection of BIBP 3226 (5  $\mu\text{g}$  in 10  $\mu\text{l}$ ) increases both spontaneous (A;  $n = 10$ ; controls,  $n = 10$ ) and evoked (B;  $n = 9$ ; controls,  $n = 9$ ) scratching. **(C)** Disruption of NPY-Y1 signaling increases spontaneous scratching in global NPY KO mice ( $n = 8$ ; littermate control,  $n = 8$ ), or following i.p. injection of wild type mice with the Y1 antagonist BMS 193885 (1 mg  $\text{kg}^{-1}$ ,  $n = 11$ ; vehicle,  $n = 11$ ). **(D)** Spontaneous scratching in *NPY::Cre; Lbx1<sup>FlpO</sup>; Tau<sup>ds-DTR</sup>; Ai65<sup>ds-idTom</sup>* mice 1 week after DT treatment is reduced by i.t. injection of the selective Y1 agonist [Leu<sup>31</sup>, Pro<sup>34</sup>]-NPY (1.5 ng in 10  $\mu\text{l}$ ;  $n = 8$ ) compared with vehicle. A two-tailed, paired t-test was used to assess statistical difference. **(E)** Evoked scratching is reduced when mice are injected with NPY (100  $\mu\text{g}$   $\text{kg}^{-1}$ , i.p.,  $n = 9$ ; vehicle,  $n = 10$ ). **(F)** Scratching in response to nape stimulation is reduced following i.t. injection of [Leu<sup>31</sup>, Pro<sup>34</sup>]-NPY ( $n = 6$ ; controls,  $n = 8$ ). \* $p < 0.05$ , \*\* $p < 0.01$ , \*\*\* $p < 0.001$ . Data: mean  $\pm$  SEM.
